# Supplementary material for: CD81 Is Essential for the Re-entry of Hematopoietic Stem Cells to Quiescence following Stress-Induced Proliferation Via Deactivation of the Akt Pathway
Source: PubMed Central journal article supplement (PMC3172193; doi:10.1371/journal.pbio.1001148), 2011-09-13

A

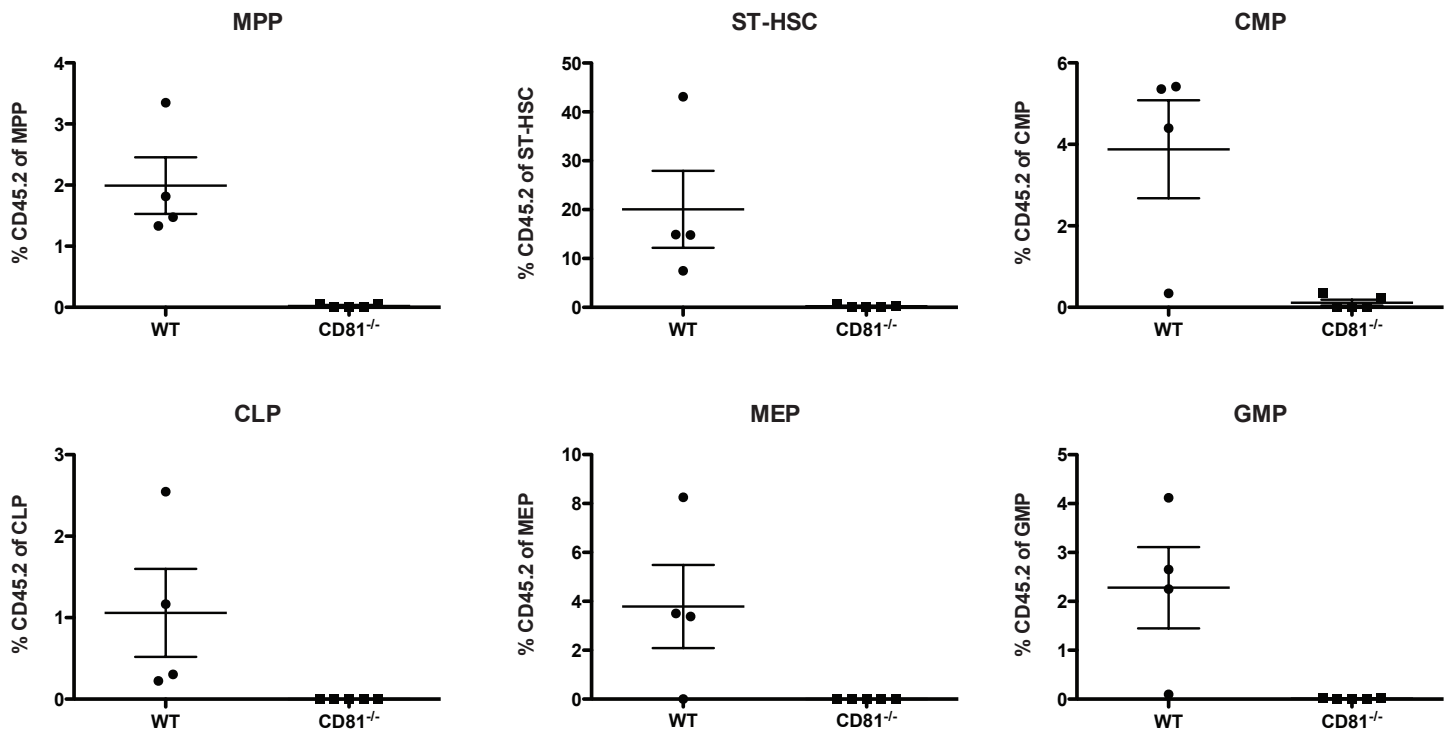

B

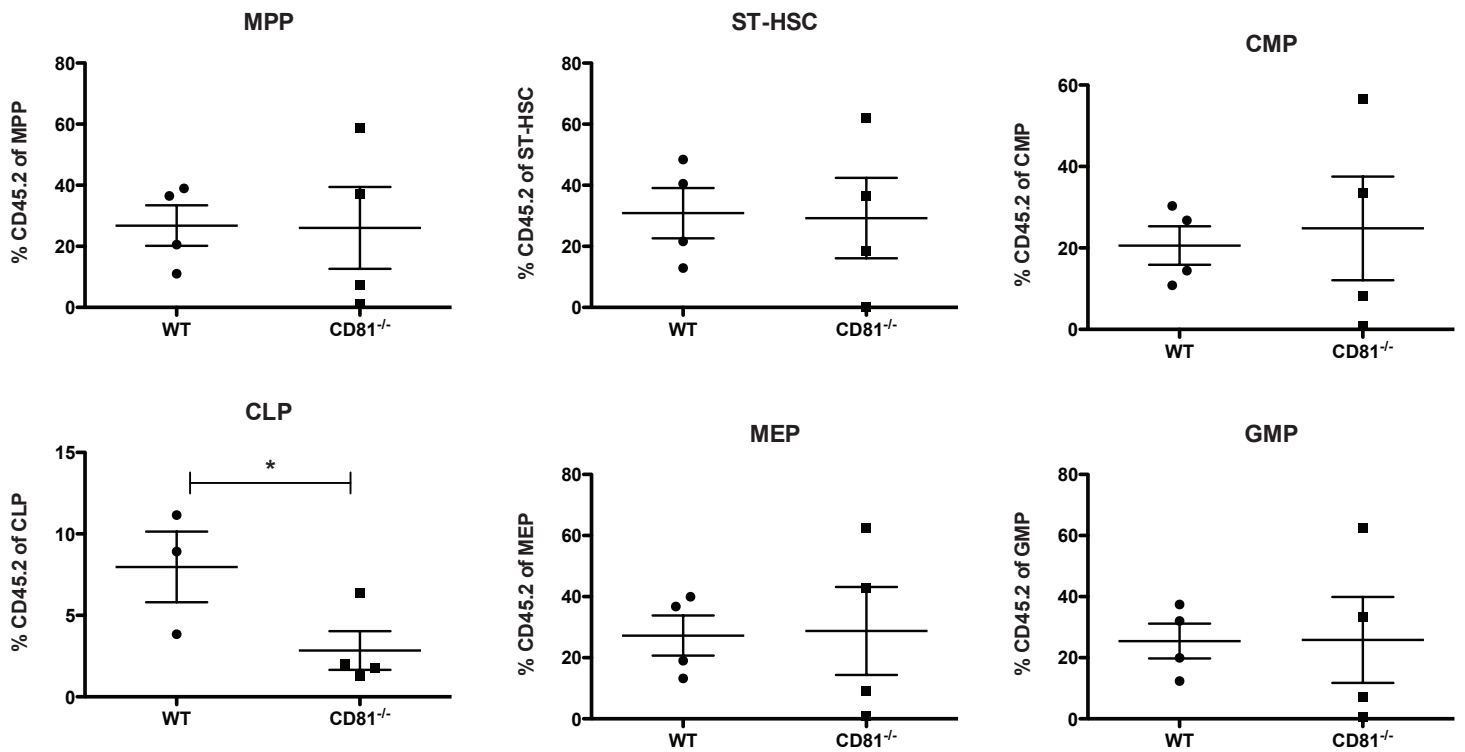

Supplement: pbio.1001148.s004.pdf [file pbio.1001148.s004.pdf]
